# Supplementary material
Source: Research Square preprint supplement (doi:10.21203/rs.3.rs-9662268/v1)

Additional file

file 1

Table 1 List of 475 Lymphoma-Associated Genes

| 475 lymphoma-associated genes | | | | | | | | | |
| --- | --- | --- | --- | --- | --- | --- | --- | --- | --- |
| ABCB1 | BMPR1A | CKS1B | ERCC3 | HBA1 | KMT2C | NFKB1 | PTEN | SMARCB1 | TRAF2 |
| ABCC2 | BRAF | CMCT6 | ERCC4 | HBA2 | KMT2D | NFKB2 | PTPN1 | SMC1A | TRAF3 |
| ABL1 | BRCA1 | CREBBP | ERCC5 | HBB | KRAS | NFKBIA | PTPN11 | SMC3 | TRAF5 |
| ABL2 | BRCA2 | CSF1R | ERG | HDAC1 | LAMP1 | NFKBIE | PTPN13 | **SMO** | TSC1 |
| ACTB | BRD4 | CSF3R | ESR1 | HDAC2 | LEF1 | NKX2-1 | PTPN2 | SOCS1 | TSC2 |
| ADH1B | BRIP1 | CTCF | ETNK1 | HDAC4 | LMO1 | NOTCH1 | PTPN6 | SOX2 | TSHR |
| AIM1 | BTG1 | CTLA4 | ETS1 | HDAC7 | LMO2 | NOTCH2 | PTPRD | SPEN | TTF1 |
| AIP | BTG2 | CTNNB1 | ETV1 | HGF | LYN | NPM1 | PTPRK | SPOP | TUBB3 |
| AKT1 | BTK | CUX1 | ETV4 | HIST1H1E | LYST | NQO1 | PTPRO | SRC | TYMS |
| AKT2 | BTLA | CXCR4 | ETV6 | HNF1A | MAF | NRAS | RAB27A | SRP72 | U2AF1 |
| AKT3 | BUB1B | CYLD | EWSR1 | HNF1B | MAFB | NSD1 | RAC3 | SRSF2 | UGT1A1 |
| ALDH2 | CALR | CYP19A1 | EZH2 | HRAS | MALT1 | NT5C2 | RAD21 | SRY | UNC13D |
| ALK | CARD11 | CYP2A6 | FANCA | HSD3B1 | MAP2K1 | NTRK1 | RAD50 | STAG2 | VEGFA |
| ANKRD26 | CBFB | CYP2B6*6 | FANCC | ID3 | MAP2K2 | NTRK3 | RAD51 | STAT3 | VHL |
| AP3B1 | CBL | CYP2C19*2 | FANCD2 | IDH1 | MAP2K4 | NUP98 | RAF1 | STAT5A | WHSC1 (NSD2) |
| APC | CBLB | CYP2C9*3 | FANCE | IDH2 | MAP3K1 | P2RY8 | RARA | STAT5B | WT1 |
| AR | CCND1 | CYP2D6 | FANCF | IGF1R | MAP3K14 | PAG1 | RASGEF1A | STAT6 | XIAP |
| ARHGAP26 | CCND2 | CYP3A4*4 | FANCG | IKBKE | MAP4K3 | PAK3 | RB1 | STIL | XPC |
| ARID1A | CCND3 | CYP3A5*3 | FANCL | IKZF1 | MAPK1 | PALB2 | RECQL4 | STK11 | XPO1 |
| ARID1B | CCNE1 | DAXX | FAS | IKZF2 | MCL1 | PAX5 | REL | STMN1 | XRCC1 |
| ARID2 | CCR4 | DDR2 | FAT1 | IKZF3 | MDM2 | PBRM1 | RELN | STT3A | YAP1 |
| ARID5B | CCT6B | DDX3X | FAT4 | IL7R | MDM4 | PC | RET | STX11 | ZAP70 |
| ASXL1 | CD22 | DDX41 | FBXO11 | INPP4B | MED12 | PDCD1 | RHOA | STXBP2 | ZBTB7A |
| ASXL2 | CD274 | DHFR | FBXW7 | INPP5D | MEF2B | PDCD1LG2 | RICTOR | **SUFU** | ZNF2 |
| ASXL3 | CD28 | DHX15 | FGFR1 | IRF1 | MEN1 | PDE11A | RNF43 | SUZ12 | ZRSR2 |
| ATG5 | CD58 | DICER1 | FGFR2 | IRF4 | MET | PDGFRA | ROS1 | SYK |  |
| ATM | CD70 | DNM2 | FGFR3 | IRF8 | MFHAS1 | PDGFRB | RPTOR | TAL1 |  |
| ATR | CD74 | DNMT3A | FGFR4 | ITPKB | MGA | PDK1 | RRM1 | TBL1XR1 |  |
| ATRX | CD79A | DNMT3B | FH | JAK1 | MGMT | PGR | RUNX1 | TBX21 |  |
| AURKA | CD79B | DOT1L | FIP1L1 | JAK2 | MITF | PHF6 | RUNX1T1 | TCF3 |  |
| AURKB | CD83 | DPYD | FLCN | JAK3 | MLH1 | PHOX2B | RUNX3 | TCL1A |  |
| AXIN1 | CDA | DTX1 | FLT1 | JARID2 | MLH3 | PIK3CA | SBDS | TEK |  |
| AXL | CDC73 | DUSP2 | FLT3 | JUN | MPL | PIK3CD | SDC4 | TEKT4 |  |
| B2M | CDH1 | DUSP22 | FLT4 | KDM2B | MRE11A | PIK3R1 | SDHA | TERT |  |
| BAP1 | CDK10 | EBF1 | FOXO1 | KDM5A | MSH2 | PIK3R2 | SDHB | TET2 |  |
| BARD1 | CDK12 | ECSIT | FOXO3 | KDM5C | MSH3 | PIM1 | SDHC | TGFBR2 |  |
| BCL10 | CDK4 | ECT2L | FYN | KDM6A | MSH6 | PLCG2 | SDHD | TLE1 |  |
| BCL11B | CDK6 | EED | GADD45B | KDR | MTHFR | PML | SERP2 | TLE4 |  |
| BCL2 | CDK8 | EGFR | GATA1 | KIF5B | MTOR | PMS1 | SETBP1 | TMPRSS2 |  |
| BCL2L1 | CDKN1B | EGR1 | GATA2 | KIR2DL4 | MUTYH | PMS2 | SETD2 | TNFAIP3 |  |
| BCL2L2 | CDKN1C | EML4 | GATA3 | KIR3DL2 | MYC | POLE | SF3B1 | TNFRSF11A |  |
| BCL6 | CDKN2A | EP300 | GNA11 | KIT | MYCL | POT1 | SGK1 | TNFRSF14 |  |
| BCL7A | CDKN2B | EPCAM | GNA13 | KLF2 | MYCN | POU2AF1 | SH2B3 | TNFRSF17 |  |
| BCOR | CDKN2C | EPHA2 | GNAQ | KLHL6 | MYD88 | PPM1D | SH2D1A | TNFRSF19 |  |
| BCORL1 | CEBPA | EPHA3 | GNAS | KLLN | MYH11 | PPP2R1A | SLC34A2 | TOP1 |  |
| BCR | CEP57 | ERBB2 | GRIN2A | KLRC1 | NAT1 | PRDM1 | SLC7A8 | TOP2A |  |
| BIM (BCL2L11) | CHD8 | ERBB3 | GSTM1 | KLRC2 | NBN | PRF1 | SMAD2 | TP53 |  |
| BIRC3 | CHEK1 | ERBB4 | GSTP1 | KLRK1 | NCSTN | PRKAR1A | SMAD4 | TP63 |  |
| BIRC5 | CHEK2 | ERCC1 | GSTT1 | KMT2A | NF1 | PRKCB | SMAD7 | TP73 |  |
| BLM | CIITA | ERCC2 | HACE1 | KMT2B | NF2 | **PTCH1** | SMARCA4 | TPMT |  |

file 2

Figure1 Transcripts, primer sequences, and CpG islands of all detected genes of HH pathway

a *SHH* gene


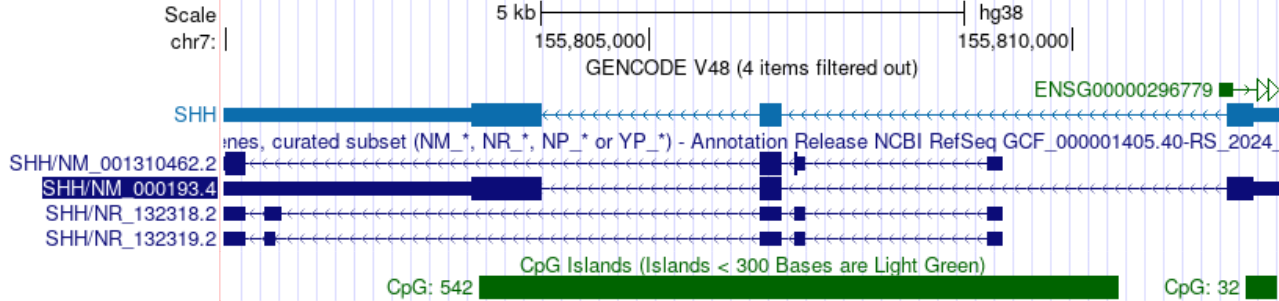


|  | primer sequences | lengths |
| --- | --- | --- |
| *SHH*-T1 | F 5' AAAGTTTTTGGGGAAGAAAAATTAA 3' | 216 bp |
|  | R 5' TCTTATAATAACAACAATTACTCCC 3' |  |
|  | F 5' TTTTTTGTTTTTTGATTGTTGTTT 3' | 299 bp |
|  | R 5' CCCATAAAACTAATAACTTCC 3' |  |
|  | F 5' GGAAGAGGAGGTATTTTAAAAAGTTG 3' | 215 bp |
|  | R 5' TCCTACCTAAATCATCAACCTATCC 3' |  |
| *SHH*-T2 | F 5' ATTTTTAATTGGAAAAGTTAGGAGG 3' | 216 bp |
|  | R 5' ATTCTAAATCCCTCCCCTAAAATAC 3' |  |
|  | F 5' TGGTTTTGATTTTTTTGTTTTTTTT 3' | 162 bp |
|  | R 5' AAAAACTCCCTCCAACCAACTAC 3' |  |
|  | F 5' GTTTGTTTGGTTTTTAGGTTTT 3' | 256 bp |
|  | R 5' TCCTTCCCCCTCCTTTTATATTA 3' |  |
|  | F 5' GTTTTTGGGTTTTTAATGTGATTGT 3' | 217 bp |
|  | R 5' CCTCTAACCTCCTACCCCTTAAA 3' |  |
|  | F 5' GGTGAAAGTAGGTAAGTTGGTTTTG 3' | 284 bp |
|  | R 5' ACCCCCTACAATAAAAACTCCAA 3' |  |
|  | F 5' TTTTTATTTGTAAAAAGTATGATTT 3' | 266 bp |
|  | R 5' TATTTACACAACCAAACCTCTCTTC 3' |  |

The primer sequences for two transcripts with different transcription start sites, NM_000193.4 and NM_001310462.2, were designed and are divided into two segments, T1 and T2. Segment T1 (*SHH-T1*) contains 43 CpG sites, 31 of which are located in CpG island 32. Segment T2 (*SHH-T2*) contains 88 CpG sites, 78 of which are located in CpG island 542.

b *PTCH1* gene


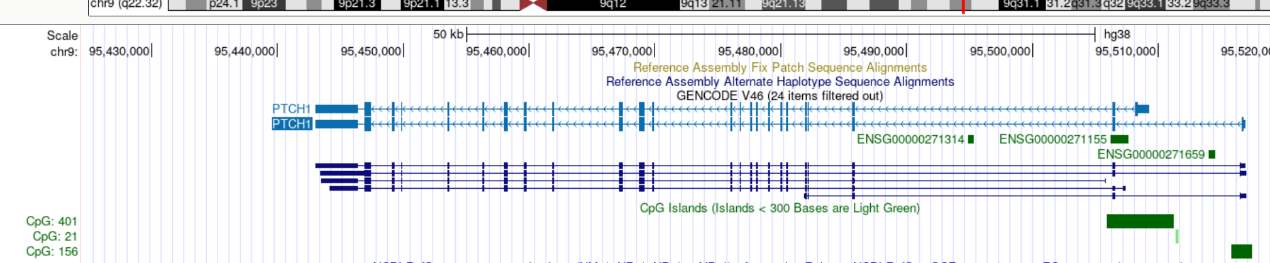


|  | primer sequences | lengths |
| --- | --- | --- |
| *PTCH1*-T1 | F 5' ATTTTTATTTATAATGTGGTTTATTTAAAG 3' | 232 bp |
|  | R 5' ACCCAAATACTCCCACCTACTATAC 3' |  |
|  | F 5' TTATTTTGGTTTTTTTTAGAAGAAA 3' | 277 bp |
|  | R 5' CACCACCTTTCATACTTACATTCTC 3' |  |
|  | F 5' TGGTTAAATGTTAGTAAATAATGTGTG 3' | 221 bp |
|  | R 5' ATCAACACAACCCTCCTAAATAAAC 3' |  |
|  | F 5' GAGGGTTATGGAATTGTTTAATAGAAATA3' | 300 bp |
|  | R 5' TAAATTTCACATCAATTCCTTTTT3' |  |
| *PTCH1*-T2 | F 5' TTAAAGATGAAATTGGTAATGTGTG 3' | 353 bp |
|  | R 5' CTAACCACCTTCCCTCCAAC 3' |  |
|  | F 5' TAAAGTGAAGTAAATTAAGGGTTTG 3' | 283 bp |
|  | R 5' CTAAATTCATTAAAAACAAACTATAC 3' |  |
|  | F 5' GTTTGAGGTTAAGGTGTTTTTGAAA 3' | 211 bp |
|  | R 5' TACTCCCCCTCCTTTCTCTCTTAT 3' |  |
|  | F 5' GAGTTGTTGTTAAGTAGTTAATAATAG 3' | 204 bp |
|  | R 5' AAAAACTCTCTCCATTTAAAAAAAA3' |  |
|  | F 5' TTATTTATTGAATTAAGGAGTTGTTG 3' | 428 bp |
|  | R 5' CCCTTCACTACAAAAAAAACCAA 3' |  |

Based on two transcripts with different transcription start sites, ENST00000437951.6 and ENST000000331920.11, primer sequences were designed and are divided into two segments, T1 and T2, as follows. Segment T1 (*PTCH1*-T1) contains 40 CpG sites, all of which are located in CpG island 156. Segment T2 (*PTCH1*-T2) contains 58 CpG sites, of which 13 are located in CpG island 21 and 43 are located in CpG island 401.

c *HHIP* gene


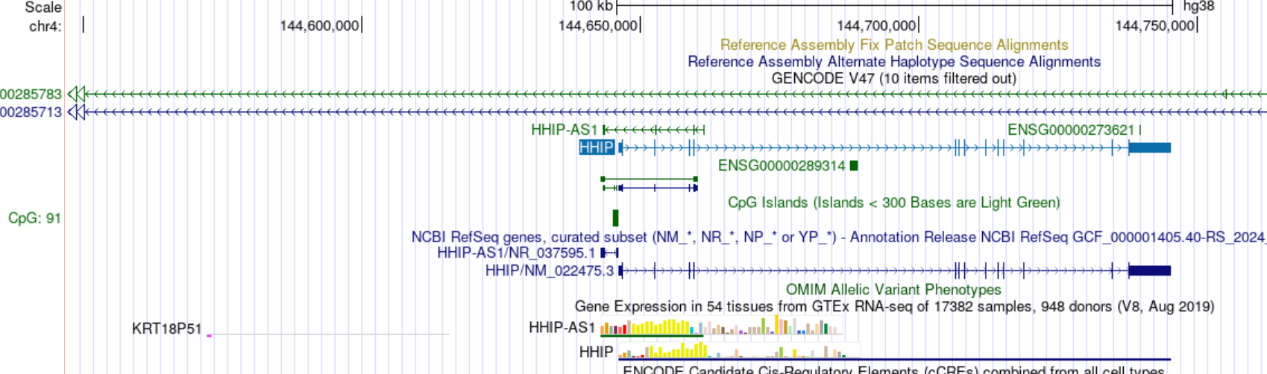


|  | primer sequences | lengths |
| --- | --- | --- |
| *HHIP* | F 5' AGTTGGGGAAAAGGTTAATTTATTT 3' | 178 bp |
|  | R 5' CACACACACACACACACCTACAC 3' |  |
|  | F 5' GAATATATGTGGGGATTTGAAAGG3' | 227 bp |
|  | R 5' AACTTAAAAACAAAAAAACATCCCA 3' |  |
|  | F 5' AAGTGGGGAGGAGAGAGGAGTTT3' | 384 bp |
|  | R 5' CCTCTTTTCTTCTTCTTTTTAACTAAC3' |  |
|  | F 5' ATGAGAGGTTGTGTGAGAAGTTGTA3' | 180 bp |
|  | R 5' AAAAAAACAACCACAAATATTCACTTAT3' |  |
|  | F 5' GTTTTAGTGTTTTTGTTGGGTAGTG3' | 244 bp |
|  | R 5' ACATCATCCTCCTATCTCTCCTTTT3' |  |
|  | F 5' TTTTTTGGGGGAGTTTTTTTTATA 3' | 262 bp |
|  | R 5' CAACCACCTTAATTTACAATTTCAC3' |  |

Based on the reference transcript ENST00000296575.8 of the *HHIP* gene, primer sequences were designed. It contains 53 CpG sites, 17 of which are located in CpG island 91.

d *GLI1* gene


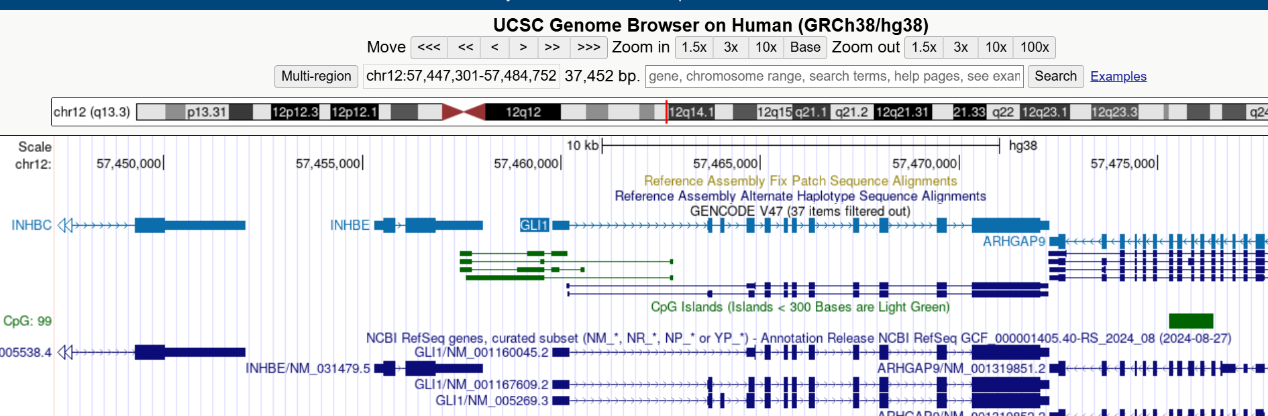


|  | primer sequences | lengths |
| --- | --- | --- |
| *GLI1* | F 5' TAGAGATTGAAATGTTGTTTTTTTT 3' | 276 bp |
|  | R 5' AACTTTCTACTCCCTCTACTAACC3' |  |
|  | F 5' GGAAGAGTAGTTAGAGTTTGTAGTGA 3' | 178 bp |
|  | R 5' ATAAAACATAAAAACAAAAAACAAC 3' |  |
|  | F 5' TTTTAATTTAATTTGATTTGTTTTAAAT3' | 225 bp |
|  | R 5' ACTAACCCCAAAAAAACCCC 3' |  |
|  | F 5' TAGTATAGGGTTTTTTAAGGGAGGG 3' | 195 bp |
|  | R 5' CAAAAACTTTTTCTCTCTCCAACC 3' |  |
|  | F 5' AAAAAGTTTTTGTAAAAGGGAAAAA 3' | 304 bp |
|  | R 5' TAAAAAACTAAACATCCCCTCAAAC3' |  |
|  | F 5' TAAGTTTAAGAGGTTGGAGGGATG3' | 215 bp |
|  | R 5' TCACAAAACAAATCAAAAATTCAAA 3' |  |

Based on the reference transcript ENST00000228682.7 of the *GLI1* gene, primer sequences were designed. It contains 16 CpG sites and does not involve any CpG islands.

e *SMO* gene


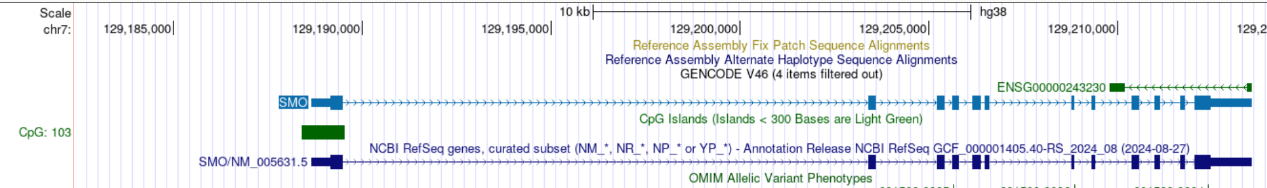


|  | primer sequences | lengths |
| --- | --- | --- |
| *SMO* | F 5' AGTTTTTGTTTTTGGAGAAGTTTTAG 3' | 187 bp |
|  | R 5' TAAATAATTTAACACCATCCTCCTC 3' |  |
|  | F 5' ATTTAATTAAAGTAGGAAAAATTGG 3' | 252 bp |
|  | R 5' AACTAAAAAAATCTAATAACCCC 3' |  |
|  | F 5' AGGGTTGAAGATAATTTGGATTG 3' | 350 bp |
|  | R 5' CAACAACAACAACAACAACAAC 3' |  |
|  | F 5' TTGTTGTTGTTGTTGTTGGG 3' | 225 bp |
|  | R 5' CAACAATATAAAAATAACCCC 3' |  |
|  | F 5' GGGGTTATTTTTATATTGTTGGT 3' | 166 bp |
|  | R 5' AAAACTCAAACCTAAACCTATTCTTTC 3' |  |

Based on the reference transcript NM_005631.5 of the *SMO* gene, primer sequences were designed. It contains 50 CpG sites, 38 of which are located in CpG island 103.

f *SUFU* gene


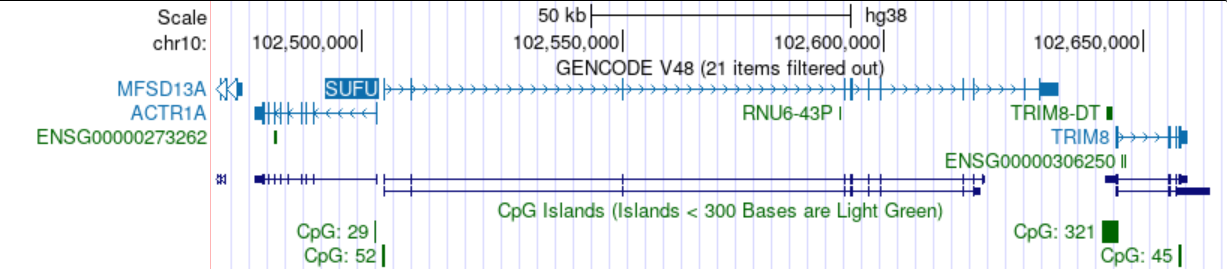


|  | primer sequences | lengths |
| --- | --- | --- |
| *SUFU* | F 5' TTTTATTTTATTTTTGTTGGTTGGT 3' | 174 bp |
|  | R 5' TAAAAAAACTTAAACTCTCCTCCTC3' |  |
|  | F 5' TTTGGGGAAGGAATTGTTTAGT 3' | 230 bp |
|  | R 5' AAAACCACAAATCCCAAAATACTAC 3' |  |
|  | F 5' ATTAGTTAATGGGTGTTTGGATAGG3' | 243 bp |
|  | R 5' CACTAAAAAAACTAAAAAAAACAAAC 3' |  |
|  | F 5' GAGGGAAGGAGTTAAGGTTTAAGTT 3' | 281 bp |
|  | R 5' CTCCAAAACCCTCTCAAATACTC 3' |  |

Based on the reference transcript ENST00000369902.8 of the *SUFU* gene, primer sequences were designed. It contains 18 CpG sites, 13 of which are located in CpG island.

file 3

Table 2 The primer sequences and lengths of the HH relevant genes

| Gene | Primer sequences | Lengths | Tm |
| --- | --- | --- | --- |
| SHH | F 5' CTAGTCCTCGTCTCCTCGC 3' | 166 | 58℃ |
|  | R 5' GTCACCCGCAGTTTCACT 3' |  |  |
| PTCH1 | F 5' TTCGCTCTGGAGCAGATTTC 3' | 152 | 58℃ |
|  | R 5' CCAAATATGAGGAGGCCCAC 3' |  |  |
| SMO | F 5' CAGGACATGCACAGCTACAT 3' | 157 | 58℃ |
|  | R 5' CAATGCTGCCCACAAAGAAG 3' |  |  |
| GLI1 | F 5' CCACCAGAGAATGGAGCATC 3' | 137 | 58℃ |
|  | R 5' AGACCACCTATCCGATCCAG 3' |  |  |
| HHIP | F 5' TGATTTGAGAACAGCCAGAGTC 3' | 184 | 58℃ |
|  | R 5' CAGCCGTAGCACTGAGCC 3' |  |  |
| GAPDH | F 5' AGAAGGCTGGGGCTCATTTG 3' | 140 | 60℃ |
| （内参） | R 5' GCAGGAGGCATTGCTGATGAT 3' |  |  |

file 4

Figure 2 Clustering heatmap of methylation levels for DMCs and DMRs and their distribution on genomic elements


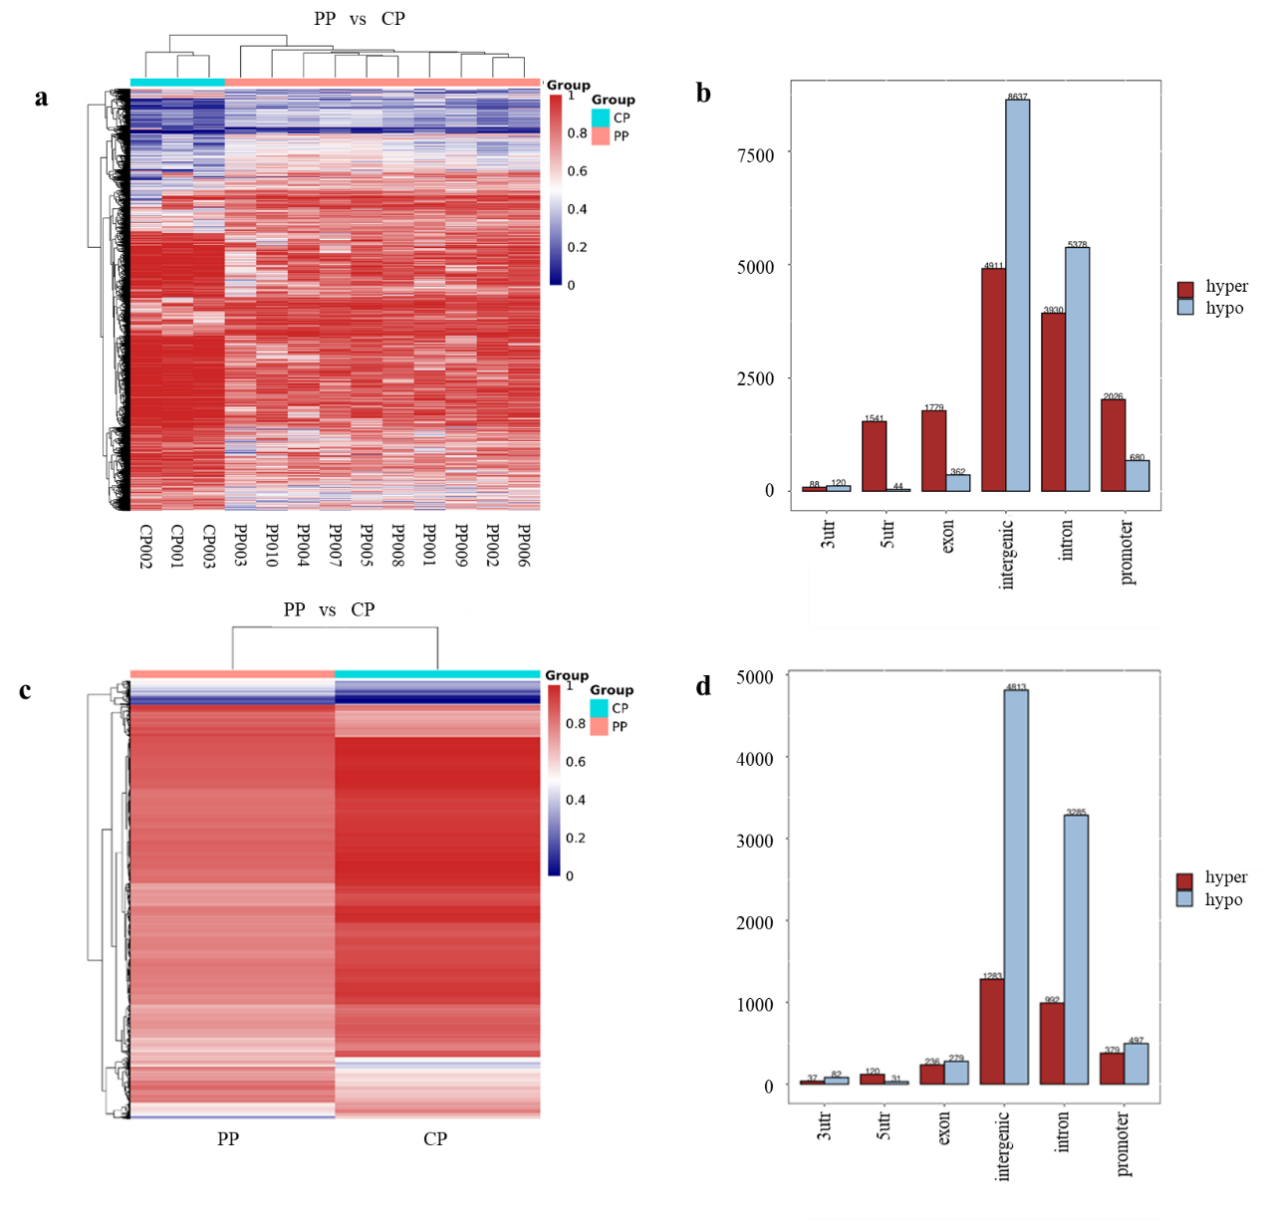


a clustering heatmap of DMC methylation levels; b distribution of DMCs across genetic elements; c clustering heatmap of DMR methylation levels; d distribution of DMRs across genetic elements;

PP: peripheral blood cfDNA from DLBCL patients, CP: peripheral blood cfDNA from controls.

file 5

Figure 3 Association analysis of *PTCH1*-T1 methylation with its expression and pathway activation in DLBCL


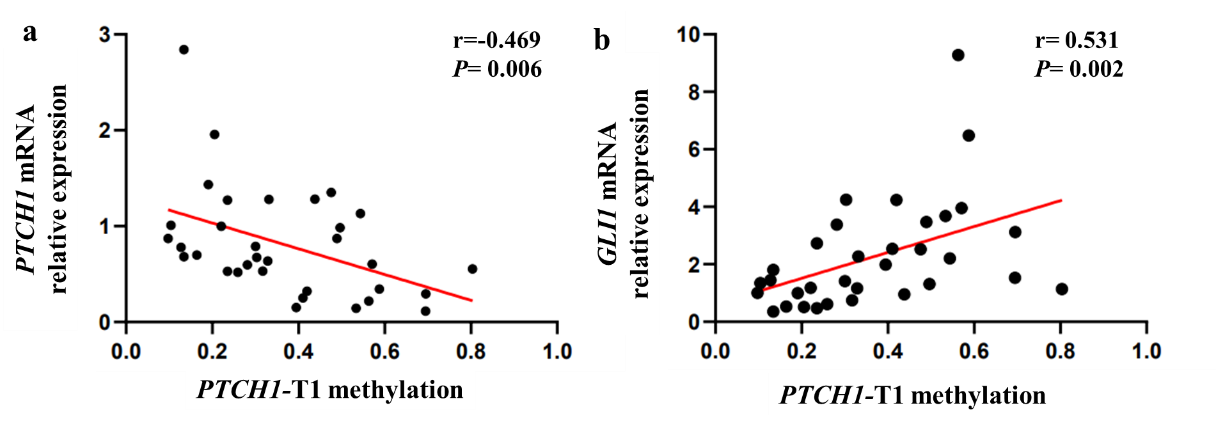


a correlation between *PTCH1*-T1 methylation level and PTCH1 mRNA expression (n = 33); b correlation between *PTCH1*-T1 methylation level and GLI1 mRNA expression (n = 33);

File 6

Figure 4 Heatmap of CpG site methylation of HH pathway-related genes in DLBCL cell lines


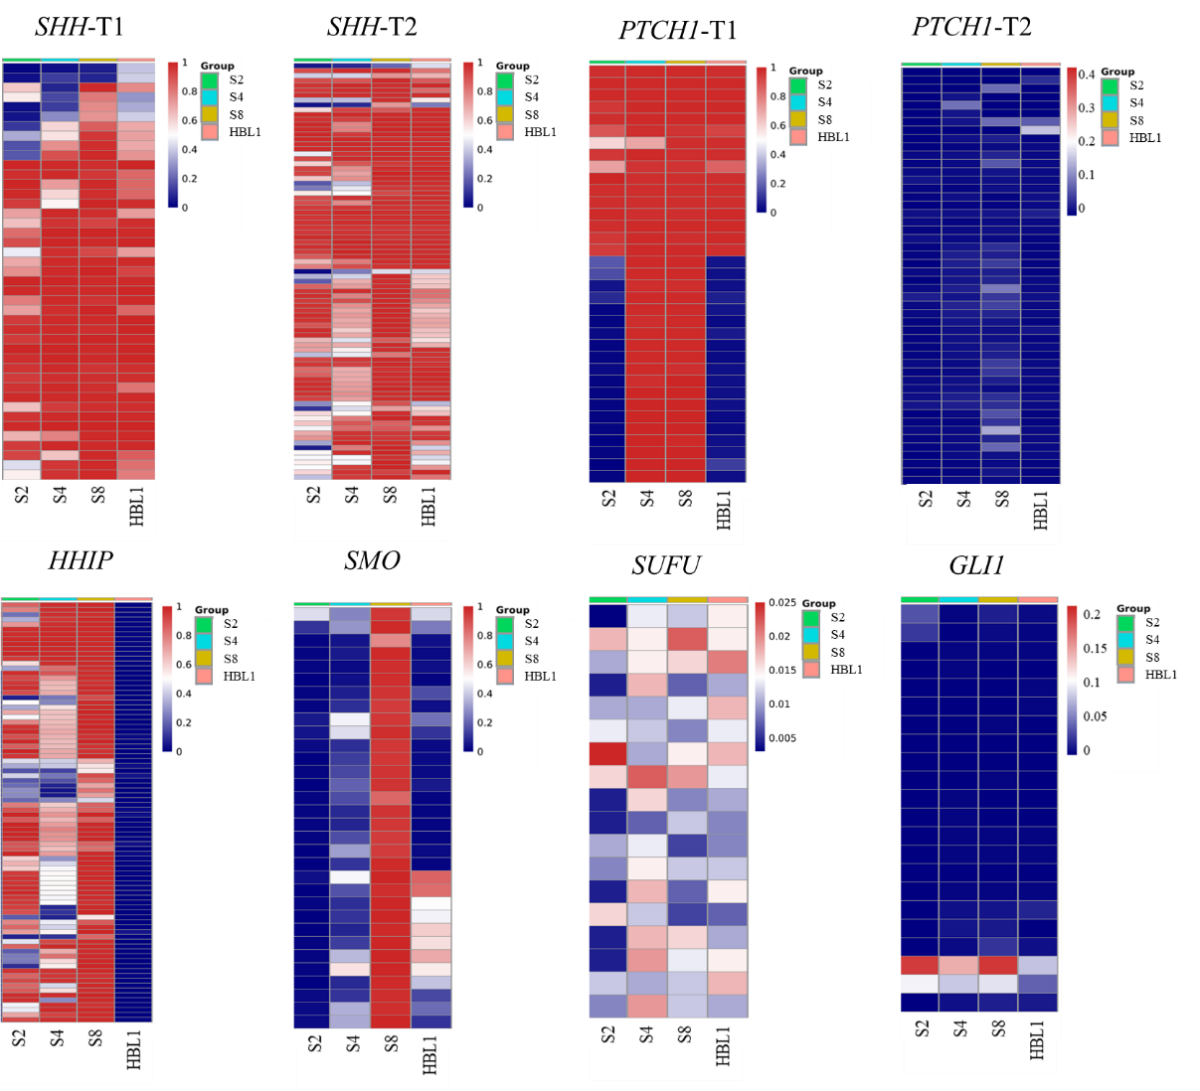

Supplement: Supplementary file 1 [file d106e38e965c583cf75fdcbc.docx]
